# Supplementary material for: Cannabinoids for treating psychiatric disorders in youth: a systematic review of randomized controlled trials
Source: Child Adolesc Psychiatry Ment Health. 2024 Dec 18;18:158. doi: 10.1186/s13034-024-00846-5 (PMC11657296; doi:10.1186/s13034-024-00846-5)
Supplement: Supplementary file 2 — Supplementary Material 2. [file 13034_2024_846_MOESM2_ESM.xlsx]

## Sheet: Raw Data
	Pre-Post Design Studies
	Study	Group	N	Pre Mean	Pre SD	Post Mean	Post SD	Change Score	Change SD	Notes
	Aran	WP	40	3.7	2.1	n/a	n/a	-1.1	1.35*	*SD estimated from range (-3.8 to 1.6)
		PC	42	3.2	1.5	n/a	n/a	-0.7	1.73*	*SD estimated from range (-4.4 to 2.5)
		PLB	39	3.7	1.5	n/a	n/a	-0.5	1.55*	*SD estimated from range (-3.7 to 2.5)
	Schnapp	WP	44	49.7	9.6	n/a	n/a	-2.3	5.6
		PC	42	50.1	9.4	n/a	n/a	-2.9	9.2
		PLB	45	49.7	8.7	n/a	n/a	-1.4	6.6
	Wilson	PC	16	262.68	58.6	248	49.72	14.68	54.74*	*SDchange calculated
		PLB	15	251.93	52.02	243.79	44.96	8.14	48.89*	*SDchange calculated
	Appiah-Kusi (Cort)	PC	16	397.15	117.9	365.67	132.94	31.48	126.14*	*SDchange calculated
		PLB	16	343.47	121.02	297.47	115.07	46	118.26*	*SDchange calculated
	Appiah-Kusi (STAI)	PC	16	37.33	8.66	44.31	11.11	6.98	10.11*	*SDchange calculated
		PLB	16	38.07	10.21	48.31	11.53	10.24	10.94*	*SDchange calculated
	Post-Only Design Studies
	Study	Group	N	Post Mean	Post SD	Notes
	da Silva (ATEC)	WP	31	64.84	26.82
		PLB	29	75	32.89
	da Silva (CARS)	WP	31	33.47	8.48
		PLB	29	37.83	9.02
	Studies Reporting LSM Changes
	Study	Group	N	LSM Change	SE	Notes
	Berry-Kravis	PC	110	-2.68	0.39
		PLB	102	-2.29	0.39
	Berry-Kravis (>90%)	PC	76	-2.99	0.43	Methylation subgroup
		PLB	91	-1	0.43	Methylation subgroup
	Studies with F-Statistics
	Study	Groups (n)	F value	df	p-value	Notes
	van Boxel	PC(16) PLB(14)	F(1,28) = 4.775	1,28	0.037	Time*treatment interaction
	Bergamaschi	PC(12) PLB(12)	F(7.2,118.5) = 6.4	7.2,118.5	<0.001	Phases*group interaction
	Legend:
	WP = Whole Plant
	PC = Pure Cannabinoid
	PLB = Placebo
	LSM = Least Squares Mean
	SE = Standard Error
	SD = Standard Deviation
	n/a = not available
	Notes on Calculations:
	SDchange when not reported = √(SDpre² + SDpost² - 2 × r × SDpre × SDpost), assuming r = 0.5
	Range to SD conversion: SD ≈ Range/4 for n > 30
	LSM changes used directly with reported SE
	F-statistics converted using: d = √(F × (n1 + n2)/(n1 × n2))

## Sheet: Data Availability Matrix
		Data Availability Matrix Table
		Study	Author (Year)	Groups (n)	Outcome Measure	Pre Means	Pre SDs	Post Means	Post SDs	Change Scores	P-values	Notes
		1	Aran (2021)	WP (40/45) PC (42/45) PLB (39/47)	HSQ-ASD	✓	✓	❌	❌	✓ (medians)	✓	Change scores as medians + ranges
		1	Aran (2021)	WP (45) PC (45) PLB (47)	CGI-S	✓	✓	❌	❌	❌	❌	Only baseline data
		1	Aran (2021)	WP (45) PC (45) PLB (47)	CGI-I	❌	❌	✓	❌	❌	✓	Only % of positive responses
		2	Schnapp (2022)	WP (44) PC (42) PLB (45)	CSHQ	✓	✓	❌	❌	✓	✓
		3	da Silva Junior (2024)	WP (31) PLB (29)	ATEC T	❌	❌	✓	✓	❌	✓	No pre-intervention data
		3	da Silva Junior (2024)	WP (31) PLB (29)	CARS	❌	❌	✓	✓	❌	✓	No pre-intervention data
		4	Efron (2020)	PC (3) PLB (4)	ABC	✓	✓	✓	✓	❌	❌	Complete dataset
		4	Efron (2020)	PC (3) PLB (4)	DASS	✓	✓	✓	✓	❌	❌	Complete dataset
		5	Berry-Kravis (2022)	PC (110) PLB (102)	ABC-CFXS SA	❌	❌	❌	✓	✓ (LSM)	✓	Only change scores (LSM)
		5	Berry-Kravis (2022)	PC (76) PLB (91)	ABC-CFXS SA >90% methyl.	❌	❌	❌	✓	✓ (LSM)	✓	Methylation subgroup analysis
		6	Wilson (2019)	PC (16) PLB (15) HC (19)	Reaction time	✓	✓	✓	✓	❌	✓	Complete dataset
		7	Appiah-Kusi (2020)	PC (16) PLB (16) HC (26)	Cortisol	✓	✓	✓	✓	❌	❌	Complete dataset
		7	Appiah-Kusi (2020)	PC (16) PLB (16) HC (26)	STAI	✓	✓	✓	✓	❌	❌	Only AUC p-values
		8	van Boxel (2023)	PC (16) PLB (15)	DMN Connectivity	✓	✓	✓	✓	❌	✓	Complete dataset
		9	Bergamaschi (2011)	PC (12) PLB (12) HC (12)	VAMS-Anxiety	✓	✓	❌	❌	✓	✓	SDs estimated from figures
		Legend:
		✓ = Data available
		❌ = Data not available
		WP = Whole Plant
		PC = Pure Cannabinoid
		PLB = Placebo
		HC = Healthy Control
		LSM = Least Square Mean
		AUC = Area Under Curve
		methyl. = methylation

## Sheet: Calculation_Excel_Proof
	Study	Year	Outcome	Pre_WP_Mean	Pre_WP_SD	Pre_WP_n				Pre_PLB_Mean	Pre_PLB_SD	Pre_PLB_n		Post_WP_Mean	Post_WP_SD	Post_WP_n				Post_PLB_Mean	Post_PLB_SD	Post_PLB_n		Pooled SD:			SE of the difference	SE	Cohens D:	Cohens D
WP vs PLB	Aran	2021	HSQ-ASD	3.7	2.1	40				3.7	1.5	39		-1.1	1.35	40				-0.5	1.55	39		1.45215					-0.413181	0.413181		Estimated SDs from Median Change ranges
PC vs PLB				Pre_PC_Mean	Pre_PC_SD	Pre_PC_n				Pre_PLB_Mean	Pre_PLB_SD	Pre_PLB_n		Post_PC_Mean	Post_PC_SD	Post_PC_n				Post_PLB_Mean	Post_PLB_SD	Post_PLB_n
PC vs PLB			HSQ-ASD	3.2	1.5	42				3.7	1.5	39		-0.7	1.7	42				-0.5	1.55	39		1.62957					-0.122732	0.122732		Estimated SDs from Median Change ranges
	Schnapp	2022		Pre_WP_Mean	Pre_WP_SD	Pre_WP_n				Pre_PLB_Mean	Pre_PLB_SD	Pre_PLB_n		Post_WP_Mean	Post_WP_SD	Post_WP_n				Post_PLB_Mean	Post_PLB_SD	Post_PLB_n
WP vs PLB			CSHQ	49.7	9.6	44				49.7	8.7	45		-2.3	5.6	44				-1.4	6.6	45		6.12618					-0.14691	0.14691
PC vs PLB				Pre_PC_Mean	Pre_PC_SD	Pre_PC_n				Pre_PLB_Mean	Pre_PLB_SD	Pre_PLB_n		Post_PC_Mean	Post_PC_SD	Post_PC_n				Post_PLB_Mean	Post_PLB_SD	Post_PLB_n
			CSHQ	50.1	9.4	42				49.7	8.7	45		-2.9	9.2	42				-1.4	6.6	45		7.96085					-0.188422	0.188422
	daSilva Junior	2024		Pre_WP_Mean	Pre_WP_SD	Pre_WP_n				Pre_PLB_Mean	Pre_PLB_SD	Pre_PLB_n		Post_WP_Mean	Post_WP_SD	Post_WP_n				Post_PLB_Mean	Post_PLB_SD	Post_PLB_n
WP vs PLB			ATEC T											64.84	26.82	31				75	32.89	29		29.9046					-0.339747	0.339747		between group effects using post-scores only
WP vs PLB			CARS											33.47	8.48	31				37.83	9.02	29		8.74485					-0.498579	0.498579		between group effects using post-scores only
	Berry Kravis			Pre_PC_Mean	Pre_PC_SD	Pre_PC_n				Pre_PLB_Mean	Pre_PLB_SD	Pre_PLB_n		Post_PC_Mean	Post_PC_SD	Post_PC_n				Post_PLB_Mean	Post_PLB_SD	Post_PLB_n
PC vs PLB			ABC-CFXS SA											-2.68	0.39	110				-2.29	0.39	102		2.83722			-0.39		-0.137458	0.137458		SE = SD pooled x Sqrt(1/n1 + 1/n2), cohens d = difference/SD pooled
				Pre_PC_Mean	Pre_PC_SD	Pre_PC_n				Pre_PLB_Mean	Pre_PLB_SD	Pre_PLB_n		Post_PC_Mean	Post_PC_SD	Post_PC_n				Post_PLB_Mean	Post_PLB_SD	Post_PLB_n		SE			difference		Cohens d
PC vs PLB			ABC-CFXS SA											-2.99	0.43	76				-1	0.43	91		2.76718			-1.99		-0.719143	0.719143
	Wilson	2019		Pre_PC_Mean	Pre_PC_SD	Pre_PC_n				Pre_PLB_Mean	Pre_PLB_SD	Pre_PLB_n		Post_PC_Mean	Post_PC_SD	Post_PC_n				Post_PLB_Mean	Post_PLB_SD	Post_PLB_n		SD Pooled of changes PC	SD Poolec Changes PLB	SD Pooled	Change scores PC	Change sc PLB
PC vs PLB			RT	262.68	58.6	16				251.93	52.02	15		248	49.72	16				243.79	44.96	15		54.7033	48.8739	51.9708	14.68	8.14	0.12584	0.12584		Calculate SDchange for each group using: SDchange = √(SDpre² + SDpost² - 2 × r × SDpre × SDpost) assuming r = 0.5
	Appiah Kusi	2020		Pre_PC_Mean	Pre_PC_SD	Pre_PC_n				Pre_PLB_Mean	Pre_PLB_SD	Pre_PLB_n		Post_PC_Mean	Post_PC_SD	Post_PC_n				Post_PLB_Mean	Post_PLB_SD	Post_PLB_n
PC vs PLB			Cortisol	397.15	117	16				343.47	121.02	16		365.67	132.94	16				297.47	115.07	18		125.73	118.157	121.766	31.48	46	-0.119245	0.119245		Calculate SDchange for each group using: SDchange = √(SDpre² + SDpost² - 2 × r × SDpre × SDpost) assuming r = 0.5
PC vs PLb			STAI	37.33	8.66	16				38.07	10.21	16		44.31	11.11	16				48.31	11.53	16		10.1101	10.9299	10.528	-6.98	-10.24	0.30965	0.30965
																								0	0	0
	Van Boxel			Pre_PC_Mean	Pre_PC_SD	Pre_PC_n				Pre_PLB_Mean	Pre_PLB_SD	Pre_PLB_n		Post_PC_Mean	Post_PC_SD	Post_PC_n				Post_PLB_Mean	Post_PLB_SD	Post_PLB_n		p-value time*treatment	Anova F(1,28)
PC vs PLB			DMN connect	0.59	0.39	16				0.77	0.37	14		0.8	0.32	16				0.62	0.33	14		0.037	4.775				0.799693	0.799693		d = √(F × (n1 + n2)/(n1 × n2))
	Bergamashi
PC vs PLB			VAMS	Pre_PC_Mean	Pre_PC_SD	Pre_PC_n				Pre_PLB_Mean	Pre_PLB_SD	Pre_PLB_n		Post_PC_Mean	Post_PC_SD	Post_PC_n				Post_PLB_Mean	Post_PLB_SD	Post_PLB_n		p-value phase by group interaction	ANOVA F7.2,118.5)
				0	0	12						12		22	5	16				38	5	14		0.001	6.4				1.0328	1.0328		d = √(F × (n1 + n2)/(n1 × n2))

## Sheet: Comprehensive Meta-Analyis Summ
	Study	Outcome	Groups (n)	C' d	Hedges' g [95% CI]	I/E	Key Calculation	Notes
	Aran	HSQ-ASD	WP(40) vs PLB(39)	0.413	0.405 [-0.042, 0.852]	I	d = (M₁-M₂)/SDpooled	Change scores, SD estimated from ranges
	Aran	HSQ-ASD	PC(42) vs PLB(39)	0.121	0.119 [-0.318, 0.556]	I	d = (M₁-M₂)/SDpooled	Change scores, SD estimated from ranges
	Aran	CGI-S	WP/PC(45) vs PLB(47)	-	-	E	-	Only baseline data available
	Aran	CGI-I	WP/PC(45) vs PLB(47)	-	-	E	-	Only percentages of positive responses
	Schnapp	CSHQ	WP(44) vs PLB(45)	0.147	0.145 [-0.272, 0.562]	I	d = (M₁-M₂)/SDpooled	Change scores with reported SDs
	Schnapp	CSHQ	PC(42) vs PLB(45)	0.187	0.184 [-0.239, 0.607]	I	d = (M₁-M₂)/SDpooled	Change scores with reported SDs
	da Silva	ATEC T	WP(31) vs PLB(29)	0.339	0.332 [-0.171, 0.835]	I	d = (M₁-M₂)/SDpooled	Post-only comparison
	da Silva	CARS	WP(31) vs PLB(29)	0.498	0.488 [-0.019, 0.995]	I	d = (M₁-M₂)/SDpooled	Post-only comparison
	Efron	ABC	PC(3) vs PLB(4)	-	-	E	-	Sample size too small (n<10)
	Efron	DASS	PC(3) vs PLB(4)	-	-	E	-	Sample size too small (n<10)
	Berry-Kravis	ABC-CFXS SA	PC(110) vs PLB(102)	0.137	0.136 [-0.132, 0.404]	I	d = LSMdiff/SDpooled	LSM change scores with SE
	Berry-Kravis*	ABC-CFXS SA	PC(76) vs PLB(91)	0.719	0.713 [0.384, 1.042]	I	d = LSMdiff/SDpooled	Methylation subgroup analysis
	Wilson	RT	PC(16) vs PLB(15)	0.126	0.122 [-0.591, 0.835]	I	d = (ΔM₁-ΔM₂)/SDpooled	Pre-post change comparison
	Appiah-Kusi	Cortisol	PC(16) vs PLB(16)	0.119	0.115 [-0.579, 0.809]	I	d = (ΔM₁-ΔM₂)/SDpooled	Pre-post change comparison
	Appiah-Kusi	STAI	PC(16) vs PLB(16)	0.309	0.300 [-0.394, 0.994]	I	d = (ΔM₁-ΔM₂)/SDpooled	Pre-post change comparison
	van Boxel	DMN	PC(16) vs PLB(14)	0.8	0.776 [0.082, 1.470]	I	d = √(F×(n₁+n₂)/(n₁×n₂))	Calculated from time*treatment F-value
	Bergamaschi	VAMS-Anxiety	PC(12) vs PLB(12)	1.033	0.992 [0.298, 1.686]	I	d = √(F×(n₁+n₂)/(n₁×n₂))	Calculated from phases*group F-value
	Legend:
	WP = Whole Plant
	PC = Pure Cannabinoid
	PLB = Placebo
	M = Mean
	ΔM = Change in Mean
	LSM = Least Squares Mean
	SD = Standard Deviation
	SE = Standard Error
	F = F-statistic
	n = sample size
	Excluded Primary Outcomes:
	Aran (2021) - CGI-S: Only baseline data available
	Aran (2021) - CGI-I: Only categorical data (percentages)
	Efron (2020) - ABC: Sample size too small (n<10)
	Efron (2020) - DASS: Sample size too small (n<10)
	*Subgroup analysis of original Berry-Kravis study
